# Supplementary material
Source: ML conference proceedings conference paper supplement (https://openaccess.thecvf.com/content/WACV2024/html/Seifi_OOD_Aware_Supervised_WACV_2024_paper.html)
Supplement: Supplementary file 1 [file Seifi_OOD_Aware_Supervised_WACV_2024_supplemental.pdf]

# OOD Aware Supervised Contrastive Learning

## Supplementary Materials

Soroush Seifi

soroush.seifi@external.toyota-europe.com

Nikolay Chumerin

nikolay.chumerin@toyota-europe.com

Daniel Olmeda Reino

daniel.olmeda.reino@toyota-europe.com

Rahaf Aljundi

rahaf.al.jundi@toyota-europe.com

### Toyota Motor Europe

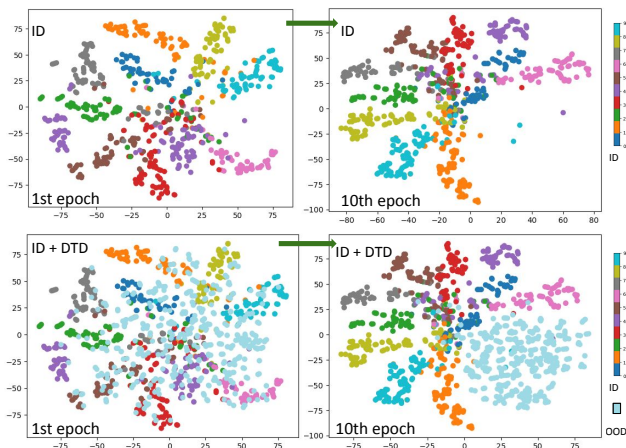

Figure 1. t-SNE 2D projection of the encoder features of: top row, Cifar-10 ID samples; second row, ID and real auxiliary OOD, DTD dataset. First column is for embeddings extracted at the first epoch (before OOD finetuning) and second column is after the finetuning process (10th epoch).

## 1. Introduction

These supplementary materials serve as additional empirical evaluation supporting the main results in the paper. First we report the OOD performance of our method using a different architecture as a backbone, Section 2. We then experiment with combining both real and fake OOD data, Section 3. We continue our analysis of ID/OOD features visualization, Section 4. Section 5 explores the OOD detection performance when other datasets are deployed for the auxiliary OOD training.

## 2. Another Backbone

In order to have a fair comparison with previous work, in the main paper we show results with a ResNet18 backbone.

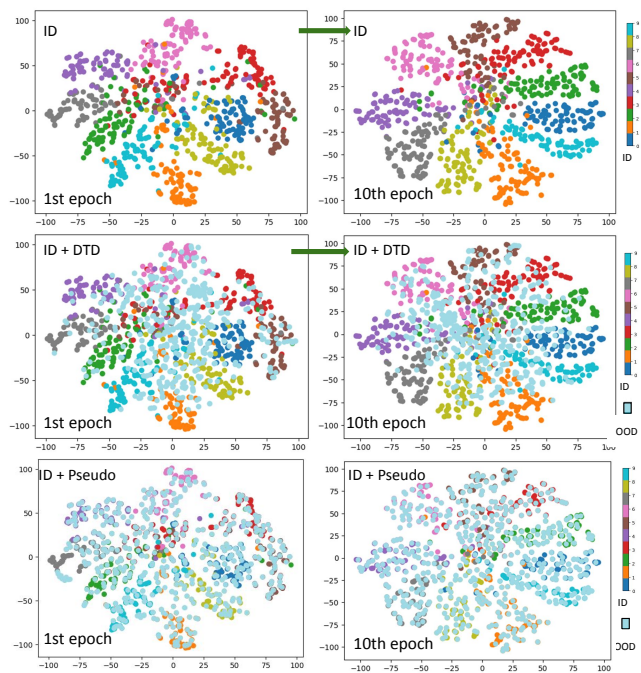

Figure 2. t-SNE 2D projection of the encoder features of: top row, Cifar-10 ID samples; second row, ID and real auxiliary OOD, DTD dataset; third row: ID and Pseudo OOD features. First column is for embeddings extracted at the first epoch (before OOD finetuning) and second column is after the finetuning process (10th epoch).

Here we investigate the effect of changing the backbone to a larger network, namely ResNet50.

Similar to the main experiments in the main paper, models are trained for 500 epochs. We notice that with ResNet50 our method requires less number of epochs for finetuning. For OPSupCon-R and OPSupCon-P, we finetune PSupCon for 25 and 10 epochs on DTD [1] and pseudo

| Dataset/Method Metrics | CE    |        |       | PSupCon     |              |              | CE + Energy  |              |              | PSupCon + Energy |              |              | OPSupCon-R   |              |              | OPSupCon-P |              |              |
|------------------------|-------|--------|-------|-------------|--------------|--------------|--------------|--------------|--------------|------------------|--------------|--------------|--------------|--------------|--------------|------------|--------------|--------------|
|                        | FPR↓  | AUROC↑ | AUPR↑ | FPR↓        | AUROC↑       | AUPR↑        | FPR↓         | AUROC↑       | AUPR↑        | FPR↓             | AUROC↑       | AUPR↑        | FPR↓         | AUROC↑       | AUPR↑        | FPR↓       | AUROC↑       | AUPR↑        |
| DTD                    | 18.17 | 95.83  | 98.79 | 14.70       | 97.06        | 99.30        | <b>5.33</b>  | <b>98.74</b> | <b>99.73</b> | 7.22             | 98.57        | 99.70        | 10.81        | 98.13        | 99.60        | 16.52      | 96.85        | 99.28        |
| SVHN                   | 2.27  | 99.44  | 99.89 | 3.41        | 99.35        | 99.87        | 1.83         | 99.46        | 99.89        | <b>0.66</b>      | <b>99.81</b> | <b>99.96</b> | 2.66         | 99.42        | 99.88        | 3.48       | 99.33        | 99.87        |
| Places365              | 24.80 | 94.45  | 98.59 | 23.46       | 95.61        | 98.97        | <b>17.84</b> | 95.54        | 98.78        | 18.96            | 96.01        | 98.99        | 19.17        | <b>96.17</b> | <b>99.09</b> | 20.14      | 96.06        | 99.06        |
| LSUN-C                 | 2.09  | 99.37  | 99.88 | 0.24        | <b>99.89</b> | <b>99.98</b> | 1.47         | 99.44        | 99.89        | 1.95             | 99.30        | 99.86        | <b>0.21</b>  | 99.87        | 99.97        | 0.23       | <b>99.89</b> | <b>99.98</b> |
| LSUN-R                 | 3.58  | 99.05  | 99.81 | <b>1.69</b> | <b>99.59</b> | <b>99.92</b> | 4.60         | 99.03        | 99.80        | 4.96             | 98.90        | 99.78        | 2.68         | 99.40        | 99.88        | 1.80       | 99.55        | 99.91        |
| iSUN                   | 4.19  | 99.00  | 99.80 | <b>1.62</b> | <b>99.59</b> | <b>99.92</b> | 3.90         | 99.13        | 99.82        | 5.12             | 98.94        | 99.79        | 2.42         | 99.41        | 99.88        | 1.89       | 99.51        | 99.91        |
| iNaturalist            | 16.24 | 96.83  | 99.33 | 7.98        | 98.47        | 99.69        | 9.66         | 97.73        | 99.49        | <b>7.40</b>      | <b>98.56</b> | <b>99.70</b> | 7.94         | 98.50        | <b>99.70</b> | 8.94       | 98.36        | 99.67        |
| CIFAR-100              | 37.77 | 92.03  | 98.03 | 40.61       | 93.14        | 98.52        | <b>31.30</b> | 92.87        | 98.12        | 34.92            | 93.54        | 98.56        | 36.57        | <b>93.71</b> | <b>98.65</b> | 39.69      | 93.24        | 98.55        |
| Mnist                  | 26.13 | 96.41  | 99.31 | 7.16        | 98.54        | 99.72        | 19.62        | 96.87        | 99.38        | 12.93            | 97.68        | 99.55        | <b>5.78</b>  | <b>98.82</b> | <b>99.77</b> | 5.97       | 98.77        | 99.76        |
| TIN                    | 28.25 | 93.56  | 98.30 | 28.19       | 94.25        | 98.60        | 22.80        | 94.64        | 98.58        | <b>22.15</b>     | 94.85        | 98.70        | 25.20        | <b>94.96</b> | <b>98.77</b> | 26.20      | 94.82        | 98.74        |
| Average                | 16.35 | 96.60  | 99.17 | 12.90       | 97.55        | 99.45        | 11.83        | 97.34        | 99.35        | 11.63            | 97.62        | 99.46        | <b>11.35</b> | <b>97.84</b> | <b>99.52</b> | 12.49      | 97.64        | 99.47        |

Table 1. **OOD detection performance on Cifar-10 with ResNet-50 backbone:** a) comparison of CE and PSupCon (1, 2 columns) and, b) comparison of OOD training with our method compared to energy finetuning. Our method outperforms performance of energy finetuning even with pseudo OOD.

| Dataset/Method Metrics | CE           |              |              | PSupCon |        |       | CE + Energy  |              |              | PSupCon + Energy |              |              | OPSupCon-R   |              |              | OPSupCon-P   |              |              |
|------------------------|--------------|--------------|--------------|---------|--------|-------|--------------|--------------|--------------|------------------|--------------|--------------|--------------|--------------|--------------|--------------|--------------|--------------|
|                        | FPR↓         | AUROC↑       | AUPR↑        | FPR↓    | AUROC↑ | AUPR↑ | FPR↓         | AUROC↑       | AUPR↑        | FPR↓             | AUROC↑       | AUPR↑        | FPR↓         | AUROC↑       | AUPR↑        | FPR↓         | AUROC↑       | AUPR↑        |
| DTD                    | 80.46        | 78.22        | 94.77        | 74.07   | 67.48  | 88.46 | <b>59.08</b> | <b>87.97</b> | <b>97.30</b> | 68.14            | 85.36        | 96.77        | 64.1         | 79.33        | 94.43        | 65.32        | 72.88        | 90.77        |
| SVHN                   | 52.41        | 90.56        | 97.99        | 85.39   | 75.30  | 94.30 | 27.71        | 95.27        | 99.01        | <b>11.65</b>     | <b>97.70</b> | <b>99.48</b> | 63.7         | 87.12        | 97.24        | 92.15        | 72.65        | 93.76        |
| Places365              | 81.49        | 77.14        | 94.26        | 86.33   | 71.97  | 92.78 | 77.81        | <b>79.87</b> | <b>95.08</b> | 81.15            | 77.89        | 94.58        | <b>75.96</b> | 77.41        | 94.30        | 81.04        | 75.39        | 93.74        |
| LSUN-C                 | 53.08        | 90.69        | 98.04        | 21.22   | 96.03  | 99.14 | 41.72        | 93.15        | 98.57        | 85.58            | 76.54        | 94.66        | 8.21         | 98.34        | 99.65        | <b>4.67</b>  | <b>99.01</b> | <b>99.79</b> |
| LSUN-R                 | 64.18        | 87.64        | 97.33        | 70.37   | 82.85  | 96.12 | 43.11        | 92.16        | 98.27        | 37.73            | 93.38        | 98.59        | <b>19.43</b> | <b>96.35</b> | <b>99.21</b> | 21.14        | 95.83        | 99.07        |
| iSUN                   | 68.13        | 86.33        | 97.03        | 67.91   | 82.61  | 95.93 | 49.27        | 90.47        | 97.90        | 38.40            | 93.06        | 98.51        | 22.72        | <b>95.09</b> | <b>98.88</b> | <b>22.00</b> | 94.95        | 98.80        |
| iNaturalist            | 85.66        | 76.57        | 94.44        | 42.80   | 90.18  | 97.68 | 78.25        | 82.48        | 96.06        | 68.61            | 85.25        | 96.73        | <b>34.62</b> | <b>92.30</b> | <b>98.21</b> | 34.72        | 91.83        | 98.00        |
| CIFAR-10               | <b>72.06</b> | <b>82.53</b> | <b>95.87</b> | 86.64   | 72.06  | 92.30 | 76.78        | 79.90        | 95.12        | 89.16            | 69.95        | 91.83        | 87.34        | 69.53        | 91.22        | 88.46        | 70.19        | 91.94        |
| Mnist                  | 94.79        | 68.66        | 92.88        | 99.81   | 44.98  | 85.08 | 93.76        | 73.31        | 94.12        | 95.28            | 63.57        | 91.15        | <b>8.58</b>  | <b>98.50</b> | <b>99.70</b> | 50.05        | 90.75        | 98.06        |
| TIN                    | 74.05        | 80.81        | 95.08        | 77.25   | 78.64  | 94.61 | 70.95        | <b>82.96</b> | <b>95.61</b> | 75.48            | 80.26        | 95.04        | <b>67.50</b> | 82.05        | 95.41        | 74.2         | 79.73        | 94.78        |
| Average                | 72.63        | 81.91        | 95.77        | 71.18   | 76.21  | 93.64 | 61.84        | 85.75        | 96.71        | 65.12            | 82.29        | 95.73        | <b>45.21</b> | <b>87.60</b> | <b>96.82</b> | 53.37        | 84.32        | 95.87        |

Table 2. **OOD detection performance on Cifar-100 with ResNet-50 backbone:** a) comparison of CE and PSupCon (1, 2 columns) and, b) comparison of OOD training with our method compared to energy finetuning. Our method outperforms performance of energy finetuning even with pseudo OOD.

OOD features respectively. We observe that the performance improves over PSupCon from the very first epochs of finetuning.

Tables 1 and 2 follow the same trend as the results reported in the main paper for different models. This suggests that our proposed method is robust to changes in the feature extractor. Especially, on the more challenging CIFAR-100 [4] dataset, our method improves over Energy finetuning [6] with a large margin, for both auxiliary (OPSupCon-R) and pseudo (OPSupCon-P) OOD training: 7% reduction in FPR and 16% reduction in FPR respectively.

### 3. Mixed OPSupCon

In the main paper, we show that in case OOD data cannot be gathered or synthetically generated, pseudo OOD data can be generated using a simple mixup of the ID features of different classes. Here, we further evaluate the performance of our method when generating OOD training data by combining real OOD features (Textures dataset, DTD) with pseudo OOD features. We use our complete loss to finetune PSupCon with such data and name this model as OPSupCon-M (as for Mixed-OOD). Table 4 reports the performance of our method when leveraging different types of

OOD data. Combining real auxiliary OOD with pseudo OOD adds a further boost and robustness to the OOD detection performance.

### 4. Encoder Features Analysis

In the main paper, we analyze the features of ID, auxiliary and pseudo OOD samples with a t-SNE 2D projection. However, we only compared ID and OOD features before starting the finetuning process with our method. Here, we analyze those features *after* finetuning with our method. We consider a ResNet18 model trained for 100 epochs on Cifar-10 dataset. We train our OPSupCon-R and OPSupCon-P for 10 epochs.

Figure 1 visualizes the 2D projections of ID features and auxiliary OOD features from DTD datasets at the beginning and at the end of the finetuning process for OPSupCon-R. We see that features from the OOD dataset are initially projected quite close to the ID features of Cifar-10 dataset which makes the OOD detection difficult. After the model is finetuned, the OOD features from DTD dataset are projected into a cluster clearly separate from the ID features. This results in a significant improvements on the OOD detection performance.

| Dataset/Method Metrics | OPSupCon-R MSP |              |              | OPSupCon-R Energy |              |              | OPSupCon-R Maximum logit |              |              | OPSupCon-P MSP |        |       | OPSupCon-P Energy |              |              | OPSupCon-P Maximum logit |              |              |
|------------------------|----------------|--------------|--------------|-------------------|--------------|--------------|--------------------------|--------------|--------------|----------------|--------|-------|-------------------|--------------|--------------|--------------------------|--------------|--------------|
|                        | FPR↓           | AUROC↑       | AUPR↑        | FPR↓              | AUROC↑       | AUPR↑        | FPR↓                     | AUROC↑       | AUPR↑        | FPR↓           | AUROC↑ | AUPR↑ | FPR↓              | AUROC↑       | AUPR↑        | FPR↓                     | AUROC↑       | AUPR↑        |
| DTD                    | 7.74           | 98.58        | 99.72        | 6.33              | 98.84        | 99.75        | <b>4.95</b>              | <b>99.04</b> | <b>99.80</b> | 17.60          | 97.01  | 99.39 | 17.33             | 96.42        | 99.16        | 16.57                    | 96.69        | 99.22        |
| SVHN                   | 2.40           | 99.38        | 99.88        | <b>0.43</b>       | <b>99.87</b> | <b>99.97</b> | 0.85                     | 99.75        | 99.95        | 2.71           | 99.21  | 99.84 | 2.38              | 99.56        | 99.91        | 5.41                     | 98.46        | 99.70        |
| Places365              | 21.19          | 95.82        | 98.99        | 24.40             | 95.09        | 98.78        | 21.17                    | 95.63        | 98.91        | 22.75          | 95.51  | 98.94 | 27.24             | 94.96        | 98.81        | <b>14.48</b>             | <b>96.76</b> | <b>99.21</b> |
| LSUN-C                 | 2.87           | 99.18        | 99.84        | 1.65              | 99.58        | <b>99.92</b> | <b>1.33</b>              | <b>99.60</b> | <b>99.92</b> | 4.19           | 98.89  | 99.79 | 2.27              | 99.47        | 99.89        | 2.39                     | 99.34        | 99.87        |
| LSUN-R                 | 8.85           | 98.35        | 99.68        | 9.92              | 98.13        | 99.63        | 9.52                     | 98.16        | 99.64        | 9.34           | 98.19  | 99.64 | 7.93              | 98.48        | 99.70        | <b>6.62</b>              | <b>98.57</b> | <b>99.72</b> |
| iSUN                   | 8.49           | 98.40        | 99.68        | <b>6.91</b>       | 98.58        | 99.72        | 7.71                     | 98.40        | 99.69        | 10.81          | 98.01  | 99.61 | 7.03              | <b>98.65</b> | <b>99.73</b> | 7.24                     | 98.52        | 99.70        |
| iNaturalist            | 15.45          | 97.36        | 99.48        | <b>9.06</b>       | <b>98.38</b> | <b>99.68</b> | 9.87                     | 98.11        | 99.63        | 20.34          | 96.58  | 99.32 | 10.91             | 98.13        | 99.62        | 12.48                    | 97.70        | 99.53        |
| CIFAR-100              | <b>33.88</b>   | <b>93.77</b> | <b>98.60</b> | 40.79             | 92.06        | 98.12        | 36.04                    | 93.15        | 98.41        | 36.08          | 93.39  | 98.56 | 47.67             | 91.06        | 97.97        | 36.42                    | 93.25        | 98.51        |
| Mnist                  | 13.20          | <b>97.87</b> | 99.58        | 0.75              | 99.78        | <b>99.96</b> | 2.79                     | 99.42        | 99.89        | 13.73          | 97.74  | 99.56 | <b>0.55</b>       | 99.70        | 99.94        | 8.10                     | 98.55        | 99.72        |
| TIN                    | 26.91          | 94.17        | 98.56        | 30.29             | 93.23        | 98.25        | 25.83                    | 94.39        | 98.61        | 28.38          | 94.03  | 98.56 | 33.22             | 93.17        | 98.29        | <b>25.55</b>             | <b>94.61</b> | <b>98.64</b> |
| Average                | 14.09          | 97.29        | 99.40        | 13.05             | 97.35        | 99.38        | <b>12.01</b>             | <b>97.56</b> | <b>99.44</b> | 16.59          | 96.86  | 99.32 | 15.65             | 96.96        | 99.30        | <b>13.52</b>             | <b>97.24</b> | <b>99.38</b> |

Table 3. Ablation on different scoring functions. Maximum logit score achieves the best average results.

| Method     | Metric | DTD          | SVHN         | Places365    | CIFAR-100    | MNIST        | TIN          | Average      |
|------------|--------|--------------|--------------|--------------|--------------|--------------|--------------|--------------|
| OPSupCon R | FPR↓   | 8.27         | 3.27         | 21.98        | 43.70        | 6.46         | 33.12        | 19.46        |
|            | AUROC↑ | 98.48        | 99.26        | 95.37        | 91.20        | 98.58        | 93.40        | 96.04        |
|            | AUPR↑  | <b>99.68</b> | 99.85        | 98.83        | 97.87        | 99.72        | 98.36        | 99.05        |
| OPSupCon P | FPR↓   | 18.65        | 4.88         | 25.02        | 46.43        | <b>4.48</b>  | 34.23        | 22.28        |
|            | AUROC↑ | 96.11        | 99.0         | 95.00        | 90.48        | <b>98.97</b> | 93.16        | 95.45        |
|            | AUPR↑  | 99.07        | 99.80        | 98.79        | 97.78        | <b>99.80</b> | 98.30        | 98.92        |
| OPSupCon M | FPR↓   | <b>8.22</b>  | <b>2.51</b>  | <b>20.34</b> | <b>43.21</b> | 4.95         | <b>31.48</b> | <b>18.45</b> |
|            | AUROC↑ | <b>98.49</b> | <b>99.40</b> | <b>95.65</b> | <b>91.30</b> | 98.92        | <b>93.58</b> | <b>96.22</b> |
|            | AUPR↑  | <b>99.68</b> | <b>99.88</b> | <b>98.88</b> | <b>97.89</b> | 99.78        | <b>98.38</b> | <b>99.08</b> |

Table 4. Comparison of our method’s variants on CIFAR-10 dataset. OpSupCon-M represents using both real auxiliary OOD (DTD) data and our pseudo OOD features when generating OOD training samples.

Figure 2 visualizes the t-SNE 2D projection of ID features, real OOD features from DTD and the generated pseudo OOD features both at the beginning and at the last epoch of the training for OPSupCon-P. We can draw the following observations on the results of finetuning with OPSupCon-P:

- The ID features clusters are more compact with a lesser of an overlap (middle of the plot).
- The OOD features of DTD are pushed further away from the dense areas of ID clusters in spite of not being trained explicitly on those features.
- The pseudo generated features get more difficult to distinguish from ID data as we proceed with the training.

Indeed the pseudo generated features act as a regularization to the ID features pushing samples of the same class to be closer together and further from other classes samples. As pseudo OOD samples are generated on the fly, while ID clusters get more compact, it gets more difficult for the model to distinguish them from the actual ID data. This is

| Method  | Metric | DTD          | SVHN         | Places365    | CIFAR-100    | MNIST        | TIN          | Average      |
|---------|--------|--------------|--------------|--------------|--------------|--------------|--------------|--------------|
| PSupCon | FPR↓   | 20.44        | 5.32         | 26.38        | 47.62        | 5.34         | 35.60        | 23.45        |
|         | AUROC↑ | 96.04        | 98.99        | 94.85        | 90.47        | 98.81        | 92.92        | 95.34        |
|         | AUPR↑  | 99.09        | 99.80        | 98.75        | 97.27        | 94.81        | 98.00        | 97.95        |
| DTD     | FPR↓   | <b>8.27</b>  | 3.27         | <b>21.98</b> | <b>43.70</b> | 6.46         | <b>33.12</b> | <b>19.46</b> |
|         | AUROC↑ | <b>98.48</b> | 99.26        | <b>95.37</b> | <b>91.20</b> | 98.58        | 93.40        | <b>96.04</b> |
|         | AUPR↑  | <b>99.68</b> | 99.85        | 98.83        | 97.87        | 99.72        | 98.36        | <b>99.21</b> |
| TIN     | FPR↓   | 19.81        | <b>2.53</b>  | 25.82        | 47.19        | <b>1.93</b>  | 33.53        | 21.80        |
|         | AUROC↑ | 96.66        | <b>99.43</b> | 95.11        | 91.14        | <b>99.55</b> | <b>94.03</b> | 95.98        |
|         | AUPR↑  | 99.30        | <b>99.89</b> | <b>98.86</b> | <b>97.99</b> | <b>99.91</b> | <b>98.67</b> | 99.10        |

Table 5. OOD detection performance when different auxiliary OOD datasets are employed for training: ID dataset is CIFAR-10. FPR ↓, AUROC ↑ and AUPR ↑.

due to the fact that pseudo OOD features become more and more similar to those of ID dataset as the training goes on. Consequently, we observed that training OPSupCon-P for a few epochs is enough to achieve a good OOD performance while training for a large number of epochs might have a negative effect instead.

## 5. Effect of the choice of Auxiliary OOD Data

In the main paper, we consider DTD (textures) dataset for training OPSupCon-R. This section investigates the effect of selecting another OOD dataset on the performance.

Here we test OPSupCon-R with TinyImagenet (TIN) [5] dataset which combines 200 different object categories and is similar in nature to CIFAR datasets. Table 5 summarises the OOD detection performance of our model trained on different OOD datasets for CIFAR-10 as the ID task.

We observe that training with TIN dataset improves the OOD detection performance over plain PSupCon on all datasets. However, training with DTD results in a better OOD detection performance as this is a generic dataset and does not represent specific objects. It is worth noting that this is a beneficial property as a similar dataset to DTD can

| Dataset/Method<br>Metrics | OPSupCon-R                             |                                        |                                       | OPSupCon-p        |                   |                   | SSD<br>SupCon     |                   |  |
|---------------------------|----------------------------------------|----------------------------------------|---------------------------------------|-------------------|-------------------|-------------------|-------------------|-------------------|--|
|                           | FPR↓ AUROC↑ AUPR↑                      | FPR↓ AUROC↑ AUPR↑                      | FPR↓ AUROC↑ AUPR↑                     | FPR↓ AUROC↑ AUPR↑ | FPR↓ AUROC↑ AUPR↑ | FPR↓ AUROC↑ AUPR↑ | FPR↓ AUROC↑ AUPR↑ | FPR↓ AUROC↑ AUPR↑ |  |
| DTD                       | <b>4.95</b> <b>99.04</b> <b>99.80</b>  | 16.57 96.69 99.22                      | 10.01 98.29 97.00                     |                   |                   |                   |                   |                   |  |
| SVHN                      | 0.85 99.75 99.95                       | 5.41 98.46 99.70                       | <b>0.41</b> <b>99.89</b> <b>99.96</b> |                   |                   |                   |                   |                   |  |
| Places365                 | 21.17 95.63 98.91                      | <b>14.48</b> <b>96.76</b> 99.21        | 28.62 94.46 <b>99.77</b>              |                   |                   |                   |                   |                   |  |
| LSUN-C                    | <b>1.33</b> <b>99.60</b> <b>99.92</b>  | 2.39 99.34 99.87                       | 6.76 98.57 98.21                      |                   |                   |                   |                   |                   |  |
| LSUN-R                    | 9.52 98.16 99.64                       | <b>6.62</b> <b>98.57</b> <b>99.72</b>  | 68.61 90.44 84.28                     |                   |                   |                   |                   |                   |  |
| iSUN                      | 7.71 98.40 99.69                       | <b>7.24</b> <b>98.52</b> <b>99.70</b>  | 69.98 89.51 82.24                     |                   |                   |                   |                   |                   |  |
| iNaturalist               | <b>9.87</b> <b>98.11</b> <b>99.63</b>  | 12.48 97.70 99.53                      | 37.18 94.63 92.86                     |                   |                   |                   |                   |                   |  |
| CIFAR-100                 | <b>36.04</b> 93.15 98.41               | 36.42 <b>93.25</b> <b>98.51</b>        | 43.03 91.60 90.70                     |                   |                   |                   |                   |                   |  |
| Mnist                     | <b>2.79</b> <b>99.42</b> <b>99.89</b>  | 8.10 98.55 99.72                       | 13.11 98.04 97.72                     |                   |                   |                   |                   |                   |  |
| TIN                       | 25.83 94.39 98.61                      | <b>25.55</b> <b>94.61</b> <b>98.64</b> | 34.62 92.62 92.20                     |                   |                   |                   |                   |                   |  |
| Average                   | <b>12.01</b> <b>97.56</b> <b>99.44</b> | 13.52 97.24 99.38                      | 31.23 94.80 93.49                     |                   |                   |                   |                   |                   |  |

Table 6. SSD Comparison ResNet-18 CIFAR-10.

| Dataset/Method<br>Metrics | OPSupCon-R                             |                                        |                                        | OPSupCon-p        |                   |                   | SSD<br>SupCon     |                   |  |
|---------------------------|----------------------------------------|----------------------------------------|----------------------------------------|-------------------|-------------------|-------------------|-------------------|-------------------|--|
|                           | FPR↓ AUROC↑ AUPR↑                      | FPR↓ AUROC↑ AUPR↑                      | FPR↓ AUROC↑ AUPR↑                      | FPR↓ AUROC↑ AUPR↑ | FPR↓ AUROC↑ AUPR↑ | FPR↓ AUROC↑ AUPR↑ | FPR↓ AUROC↑ AUPR↑ | FPR↓ AUROC↑ AUPR↑ |  |
| DTD                       | 51.22 88.44 <b>97.28</b>               | 54.23 84.77 95.89                      | <b>50.19</b> <b>90.79</b> 83.24        |                   |                   |                   |                   |                   |  |
| SVHN                      | 44.26 92.39 98.39                      | 49.49 90.89 98.04                      | <b>11.77</b> <b>97.87</b> <b>99.17</b> |                   |                   |                   |                   |                   |  |
| Places365                 | 74.52 79.30 94.79                      | <b>74.45</b> <b>79.71</b> <b>94.95</b> | 79.30 76.64 98.86                      |                   |                   |                   |                   |                   |  |
| LSUN-C                    | 20.38 96.48 99.27                      | <b>18.10</b> <b>96.71</b> <b>99.30</b> | 42.34 93.53 91.62                      |                   |                   |                   |                   |                   |  |
| LSUN-R                    | 38.54 <b>93.01</b> <b>98.49</b>        | <b>37.85</b> 92.78 98.43               | 84.85 81.57 74.13                      |                   |                   |                   |                   |                   |  |
| iSUN                      | 46.45 <b>91.33</b> <b>98.13</b>        | <b>46.38</b> 90.82 97.97               | 86.46 80.52 70.54                      |                   |                   |                   |                   |                   |  |
| iNaturalist               | 47.71 89.87 97.63                      | <b>45.38</b> <b>89.97</b> <b>97.64</b> | 73.87 82.44 78.91                      |                   |                   |                   |                   |                   |  |
| CIFAR-10                  | 84.74 71.01 91.50                      | <b>84.08</b> <b>73.11</b> <b>92.73</b> | 87.24 69.82 66.21                      |                   |                   |                   |                   |                   |  |
| Mnist                     | 33.89 <b>94.38</b> <b>98.83</b>        | <b>33.78</b> 94.37 <b>98.83</b>        | 55.20 89.09 87.09                      |                   |                   |                   |                   |                   |  |
| TIN                       | <b>68.0</b> <b>82.67</b> <b>95.52</b>  | 69.23 82.12 95.44                      | 74.91 80.19 77.33                      |                   |                   |                   |                   |                   |  |
| Average                   | <b>50.97</b> <b>87.89</b> <b>96.98</b> | 51.29 87.53 96.92                      | 63.71 84.24 82.71                      |                   |                   |                   |                   |                   |  |

Table 7. SSD Comparison ResNet-18 CIFAR-100.

be easily generated synthetically .

## 6. Choice of the scoring function

In the main paper, we consider Maximum Logit [2] as our scoring function. This section investigates the effect of selecting two other commonly used scoring functions namely Maximum Softmax Probability [3] and (Sum) Energy [6] score for detecting OOD examples.

We observe that on average Maximum Logit score achieves the best OOD detection performance for both OPSupCon-R and OPSupCon-P models. This is due to the fact that the maximum logit measures the distance to the class prototypes which is the metric being optimized during OOD training in our method.

## 7. Comparison with SSD [7]

We compare our method against various state-of-the-art works in tables 3 and 4 of the main paper and show OPSupCon-R performs the best compared to methods from different lines of literature.

We notice that OPSupCon-R achieves an overall lower performance on FPR and AUROC metrics for the CIFAR-100 dataset compared to the self-supervised method proposed in [7]. This is mainly due to the performance gap on the SVHN dataset. Our method achieves better results on the majority of the other datasets.

In this section, we extensively compare our method to SSD with the settings defined in section 4.1 of the main paper. This is the optimal default setting for both OPSupCon-P and SSD [7]. Besides, we evaluate the performance on a larger number of datasets here.

As shown in tables 6 and 7, OPSupCon-P outperforms SSD on the large majority of the datasets achieving a much better average on all metrics. Therefore, we confirm that the slightly better overall performance of SSD on table 4 of the main paper is justified by the smaller number of evaluated datasets and SSD’s superior performance on the SVHN dataset.

## References

- [1] Mircea Cimpoi, Subhansu Maji, Iasonas Kokkinos, Sammy Mohamed, and Andrea Vedaldi. Describing textures in the wild. In *Proceedings of the IEEE conference on computer vision and pattern recognition*, pages 3606–3613, 2014. 1
- [2] Dan Hendrycks, Steven Basart, Mantas Mazeika, Mohamadreza Mostajabi, Jacob Steinhardt, and Dawn Song. Scaling out-of-distribution detection for real-world settings. *ICML*, 2022. 4
- [3] Dan Hendrycks and Kevin Gimpel. A baseline for detecting misclassified and out-of-distribution examples in neural networks. *arXiv preprint arXiv:1610.02136*, 2016. 4
- [4] Alex Krizhevsky, Geoffrey Hinton, et al. Learning multiple layers of features from tiny images. 2009. 2
- [5] Ya Le and Xuan Yang. Tiny imagenet visual recognition challenge. *CS 231N*, 7(7):3, 2015. 3
- [6] Weitang Liu, Xiaoyun Wang, John Owens, and Yixuan Li. Energy-based out-of-distribution detection. *Advances in Neural Information Processing Systems*, 33:21464–21475, 2020. 2, 4
- [7] Vikash Sehwal, Mung Chiang, and Prateek Mittal. Ssd: A unified framework for self-supervised outlier detection. In *International Conference on Learning Representations*, 2021. 4
